# Supplementary material
Source: PubMed Central journal article supplement (PMC6500592)

**Supplemental Figure 1.** Manual cell count with FIJI software. (A) DAPI, (B) Foxp3, (C) ROR $\gamma$ T, (D) IL-6, (E) Ki-67, (F) Granzyme B, (G) T-bet, and (H) CD4.

A

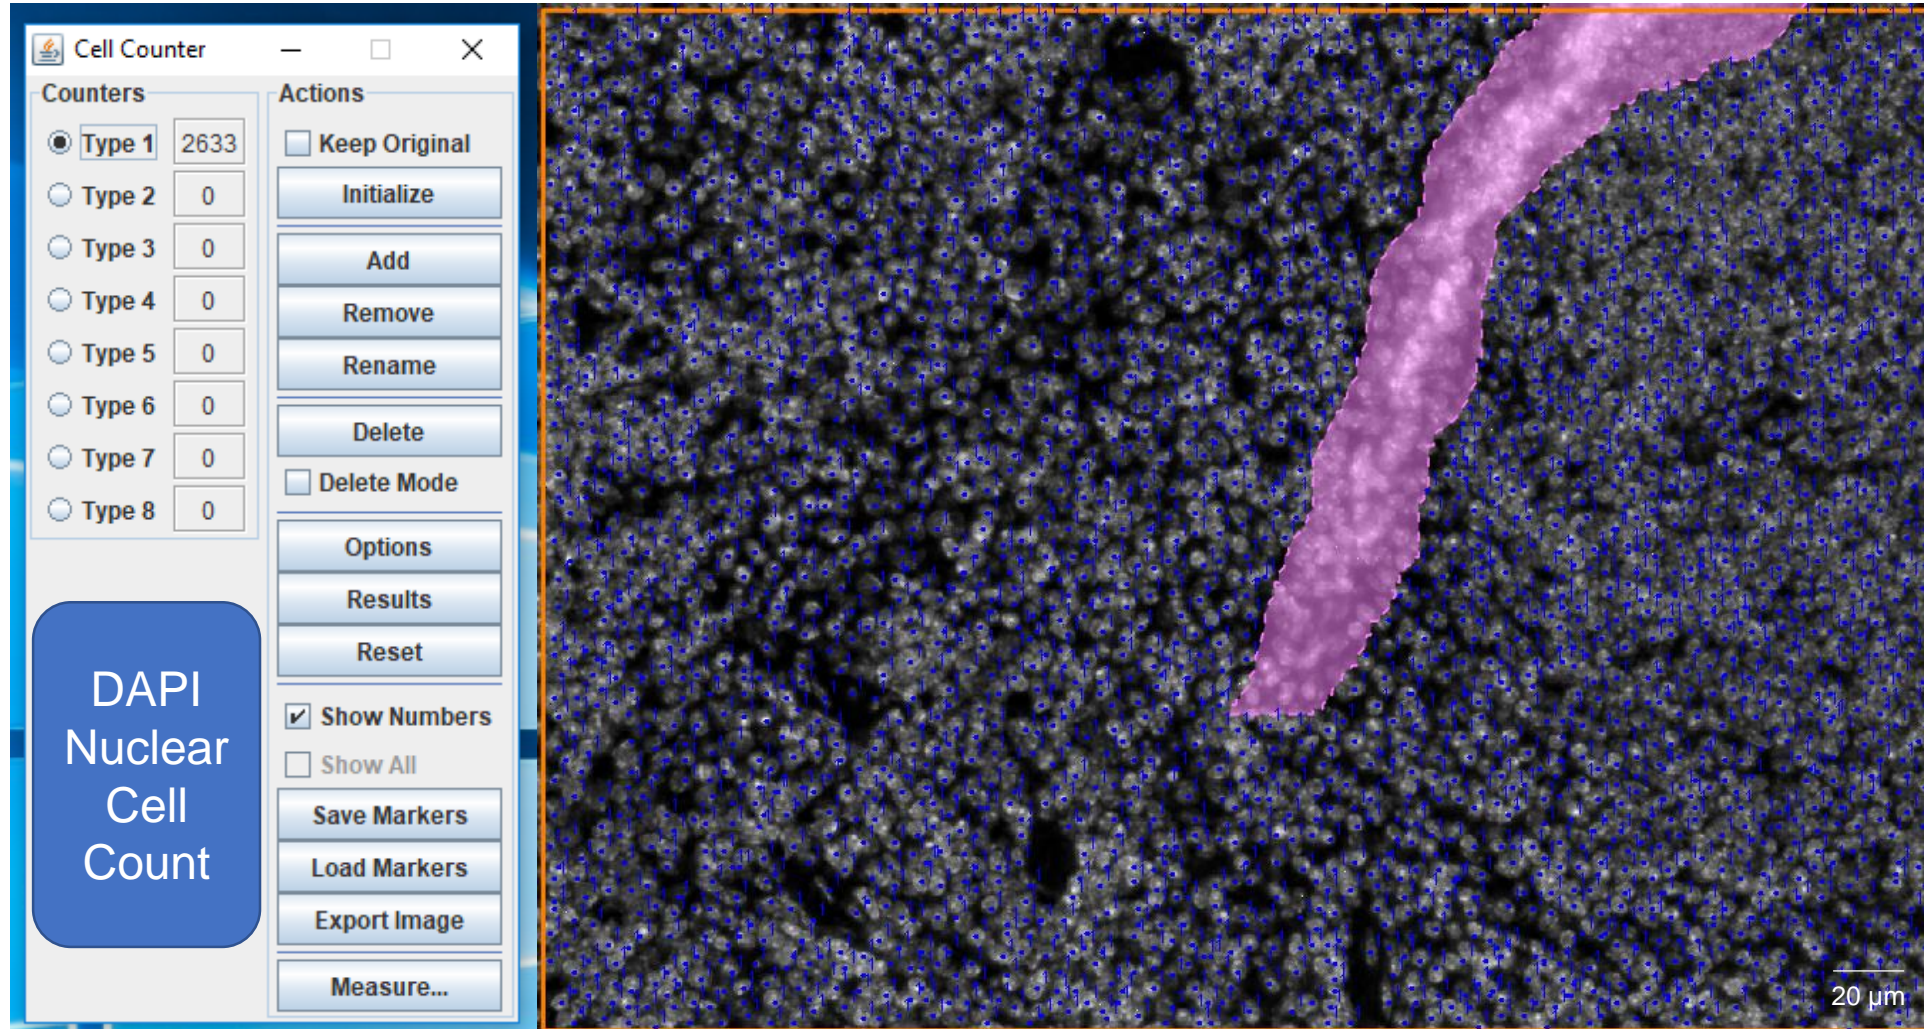

# Foxp3 Nuclear Cell Count

B

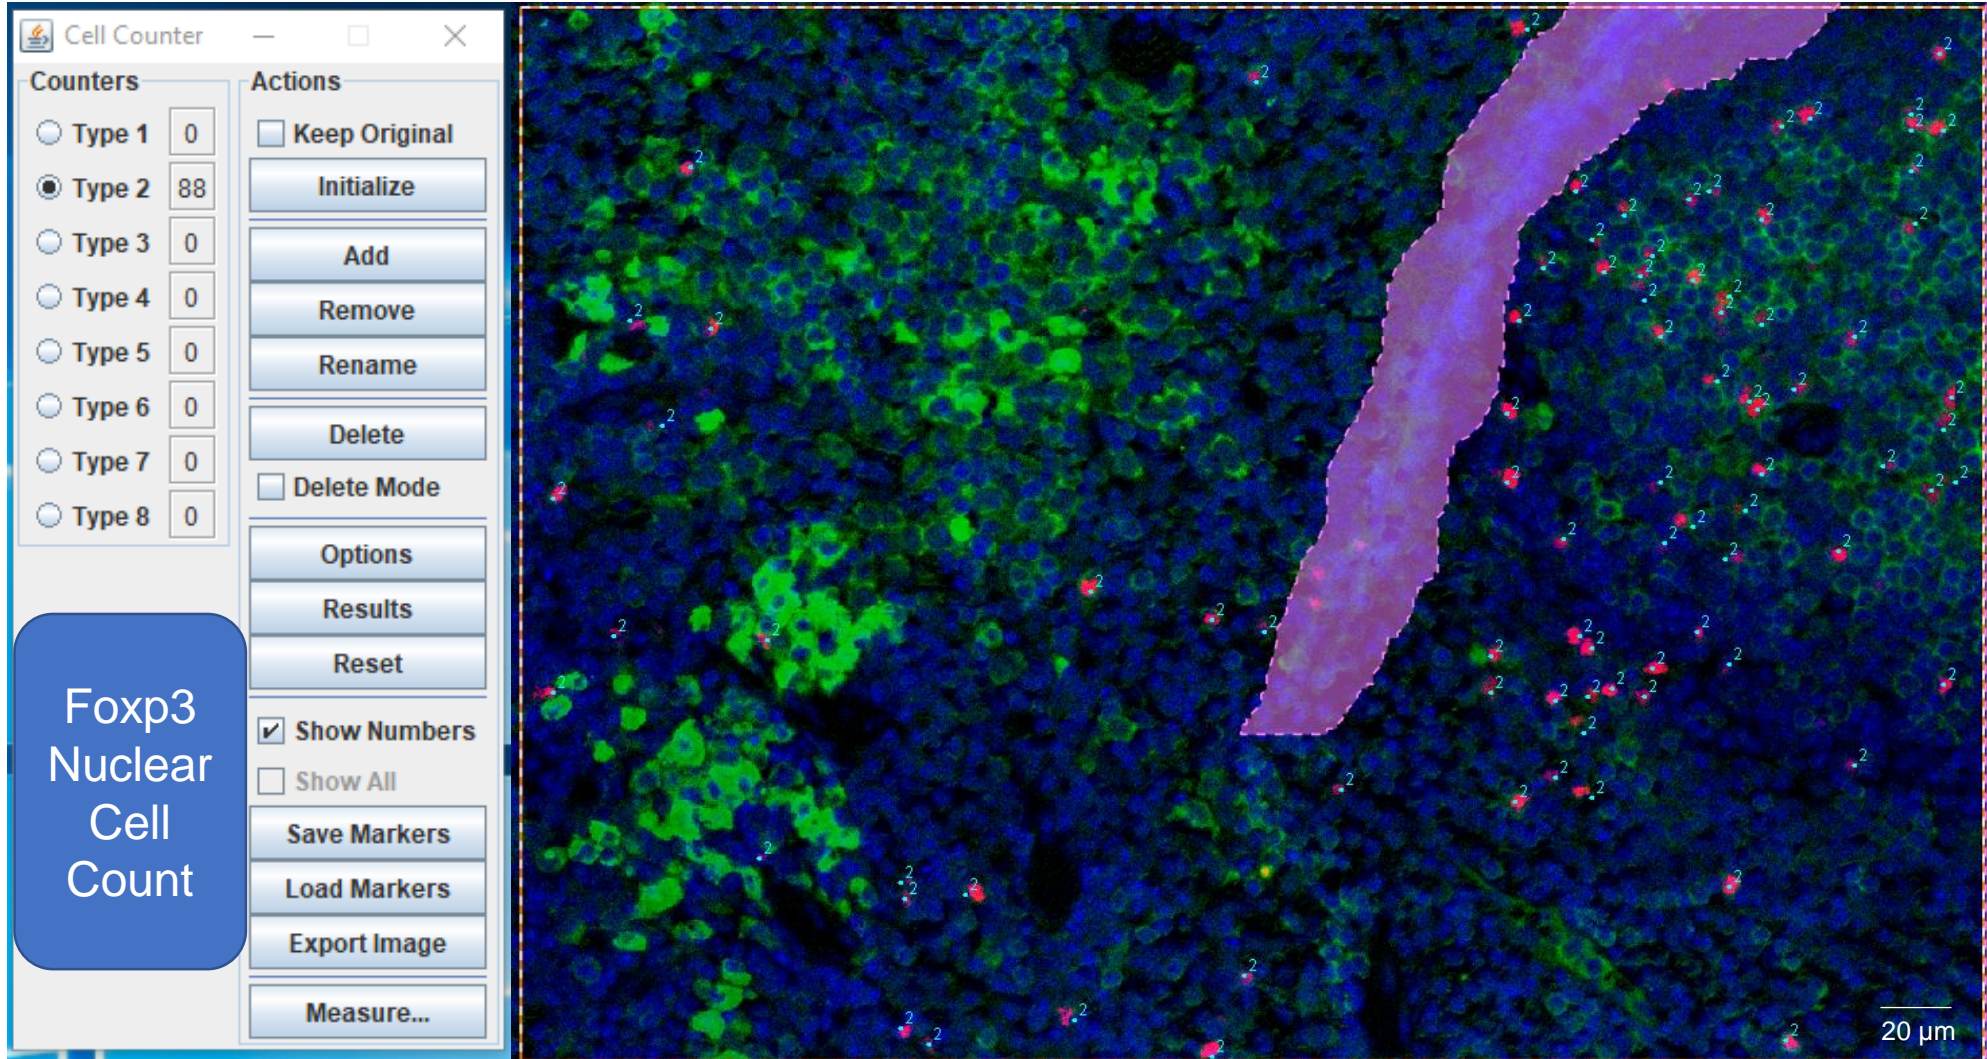

# ROR $\gamma$ T Cell Count

C

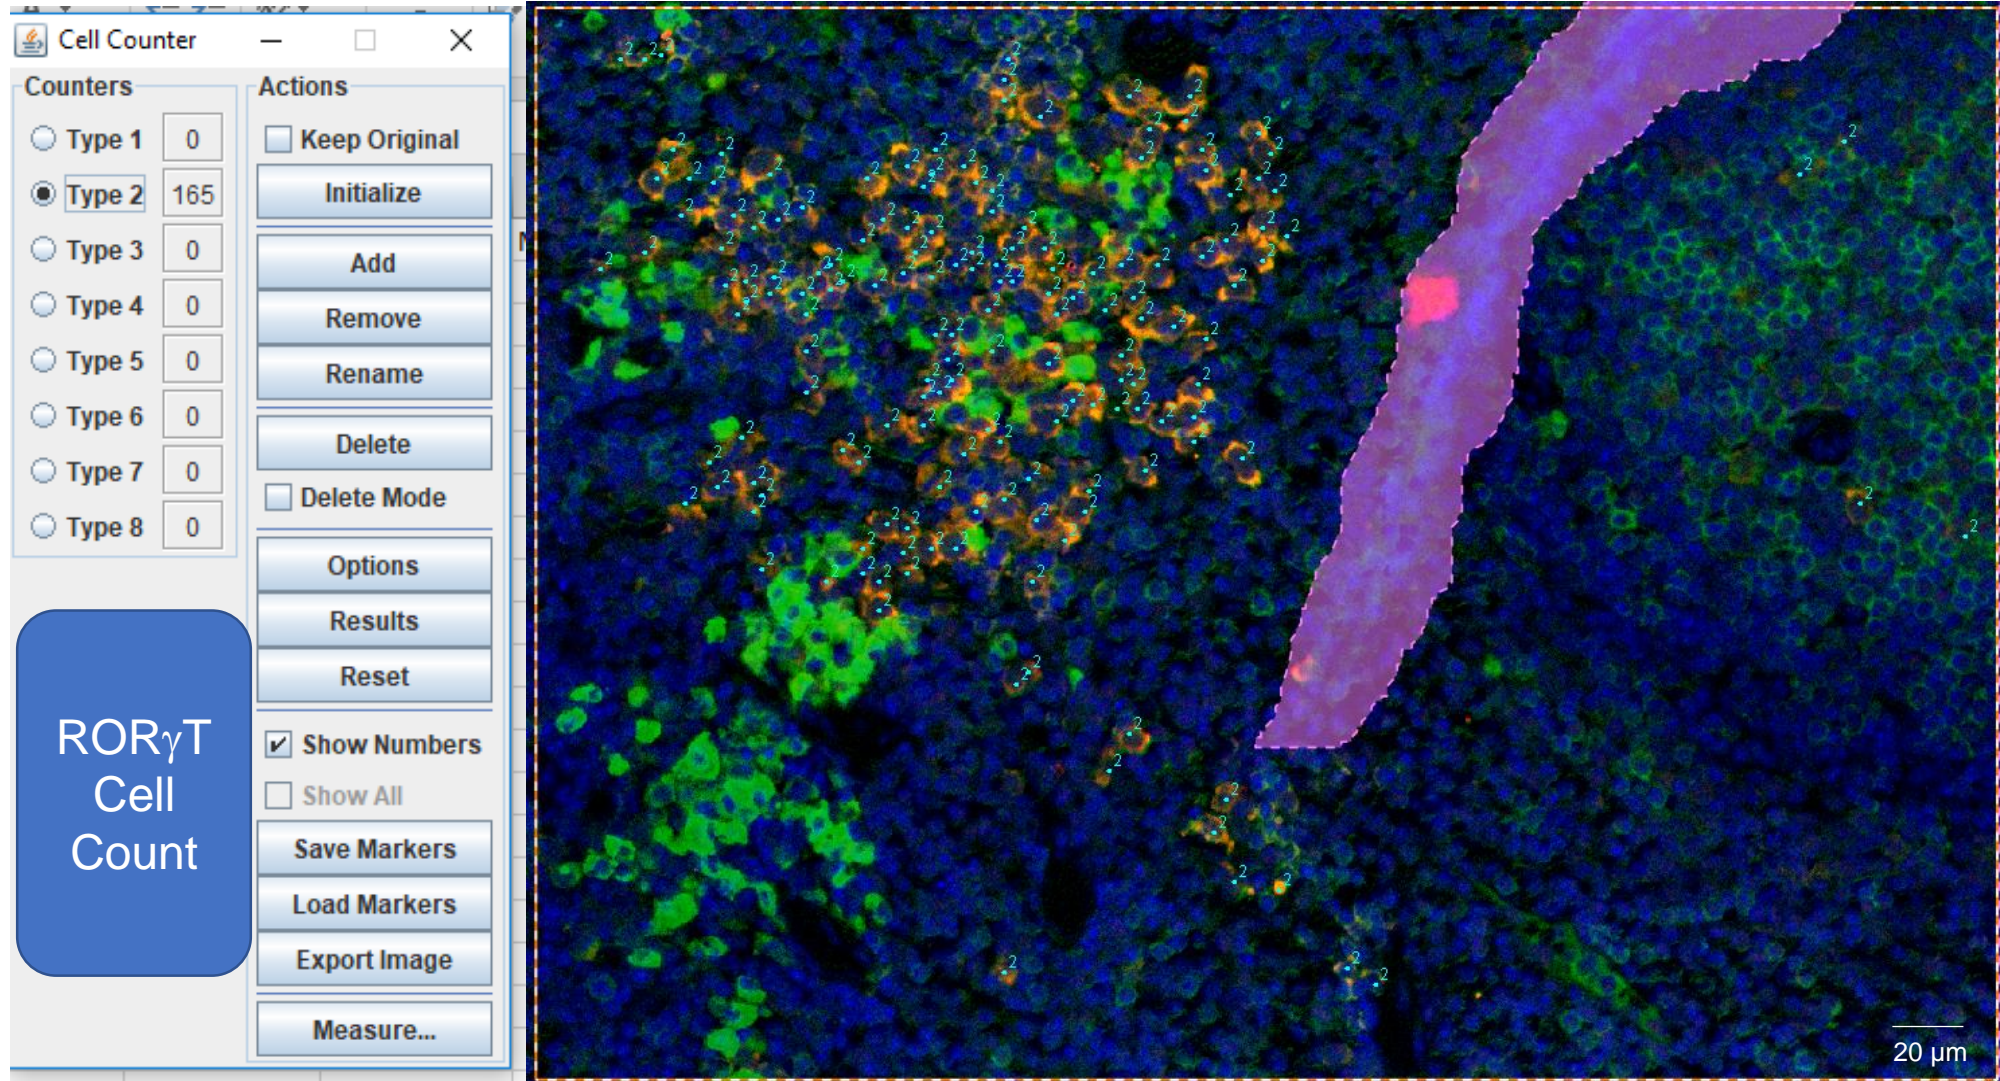

# IL-6 Cell Count

D

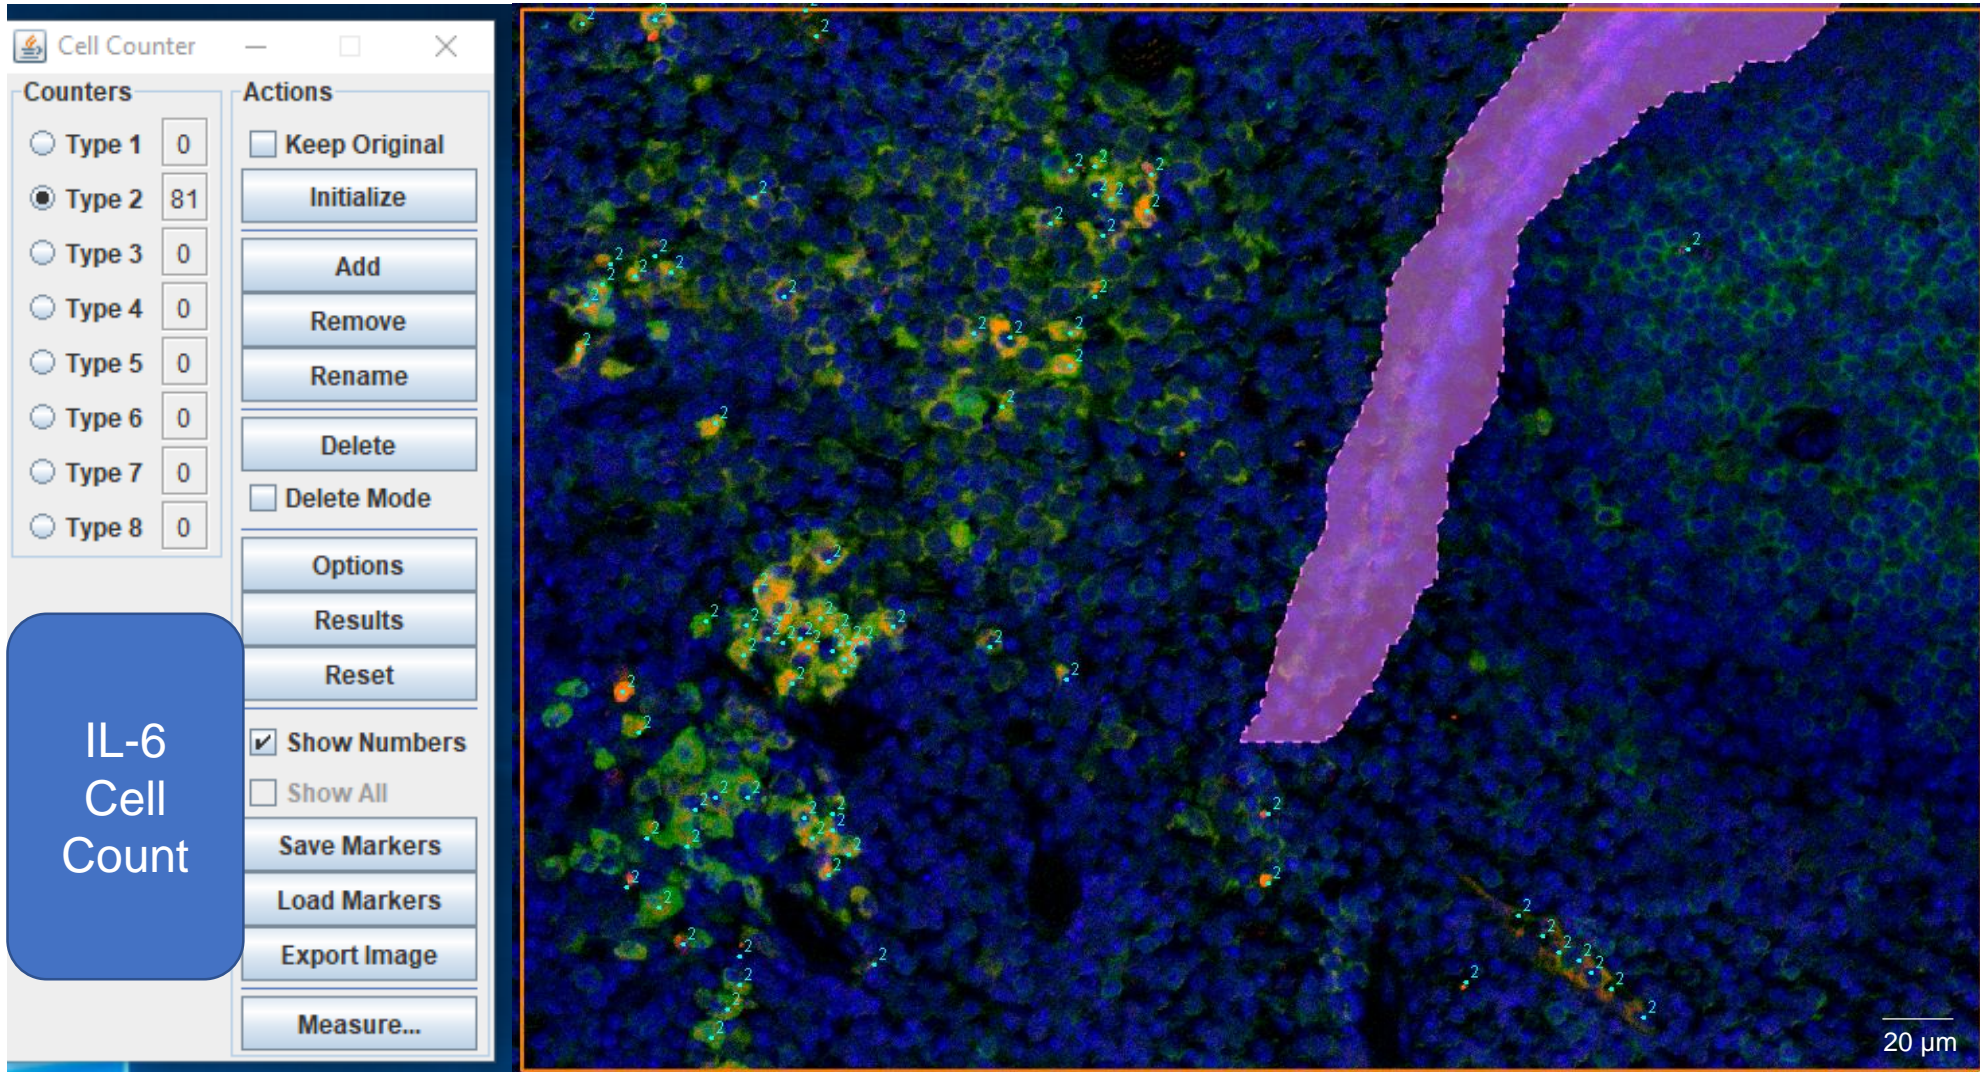

# Ki-67 Cell Count

E

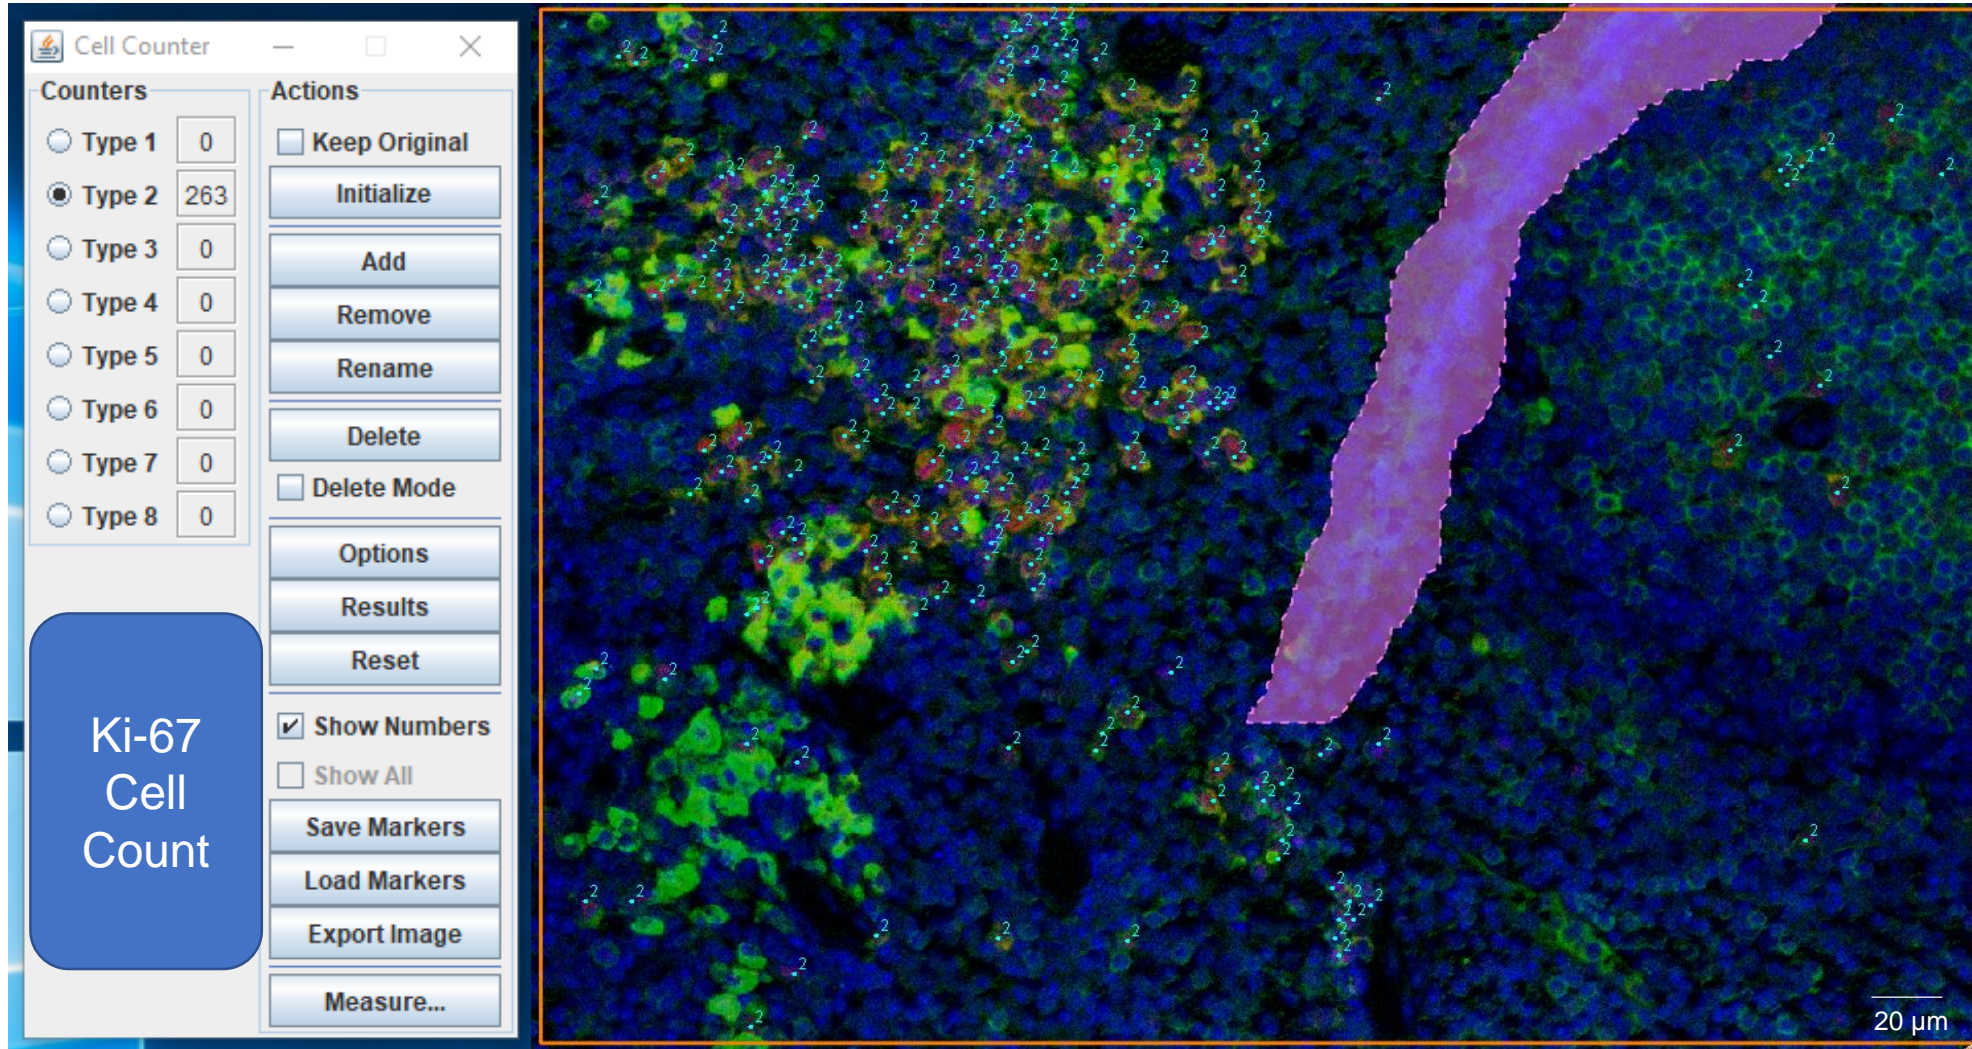

# Granzyme B Cell Count

F

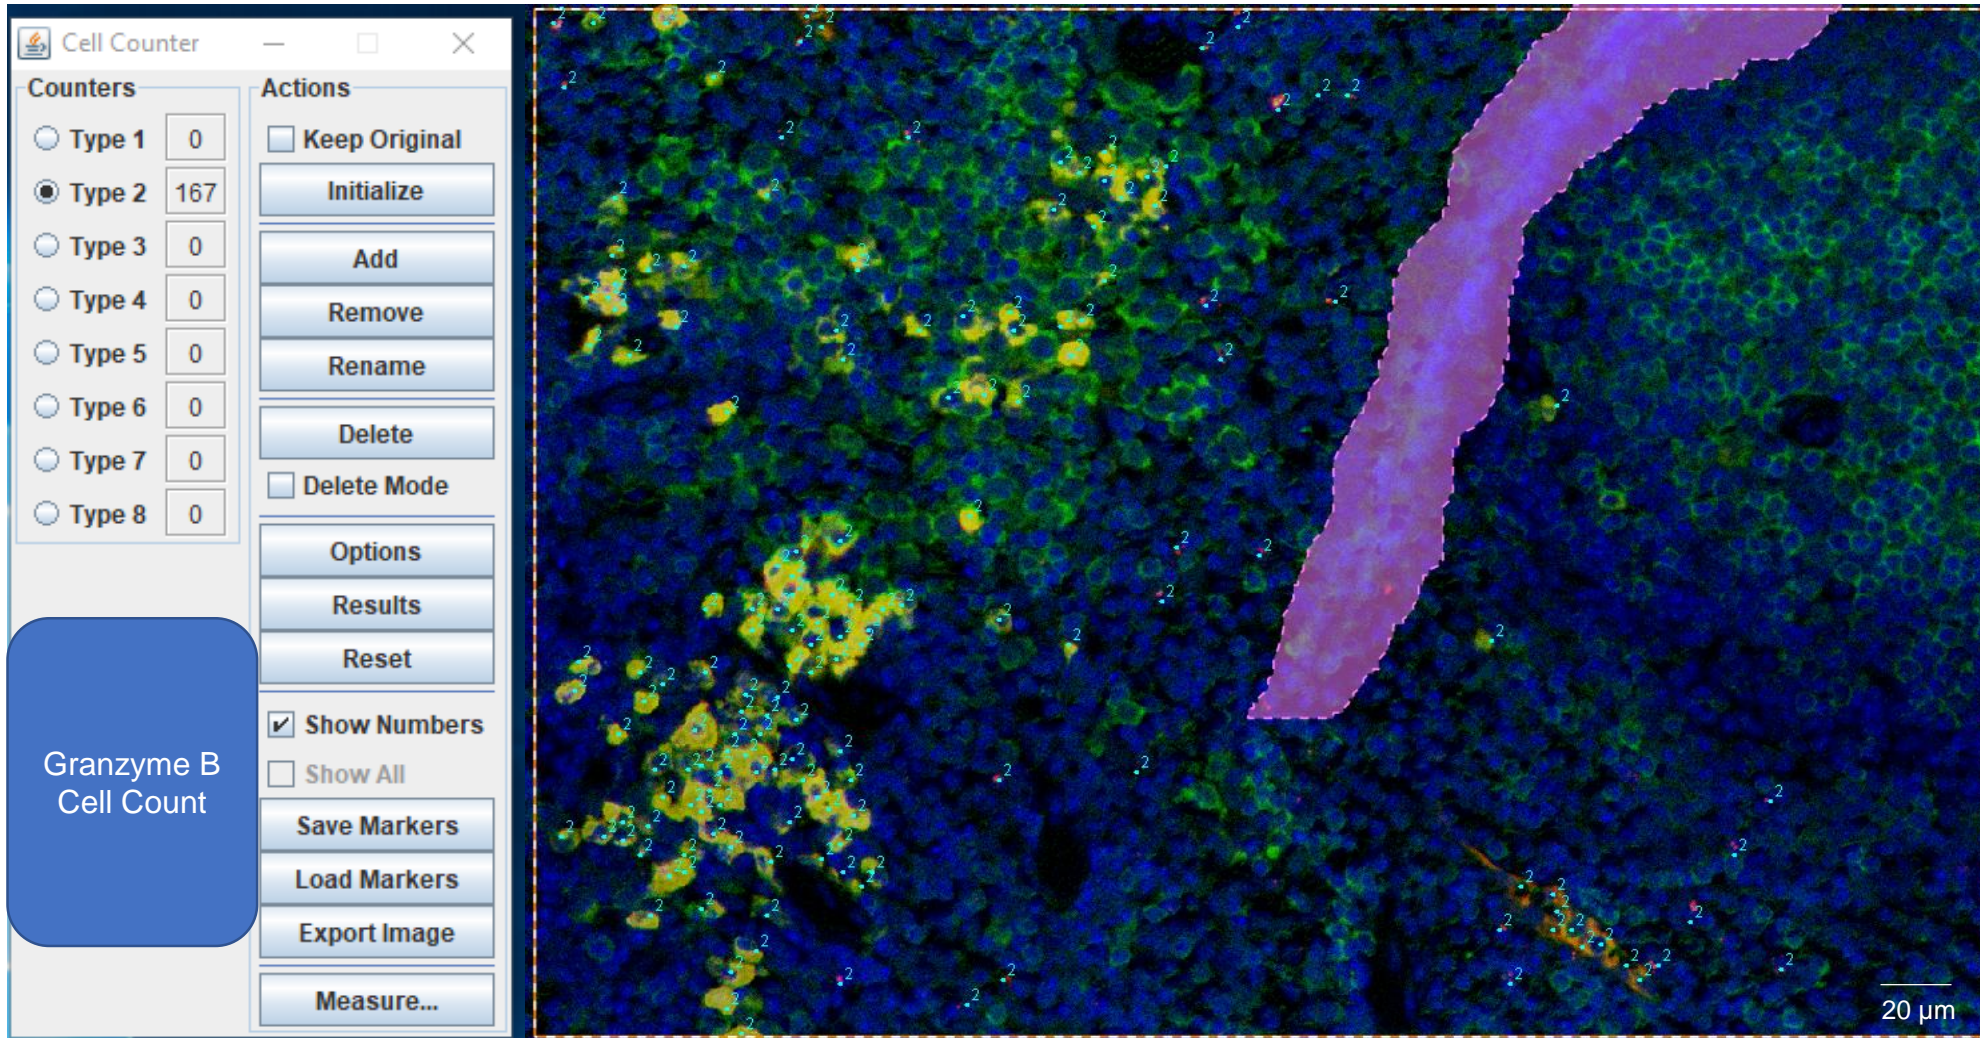

# T-bet Nuclear and Cytoplasmic Cell Count

G

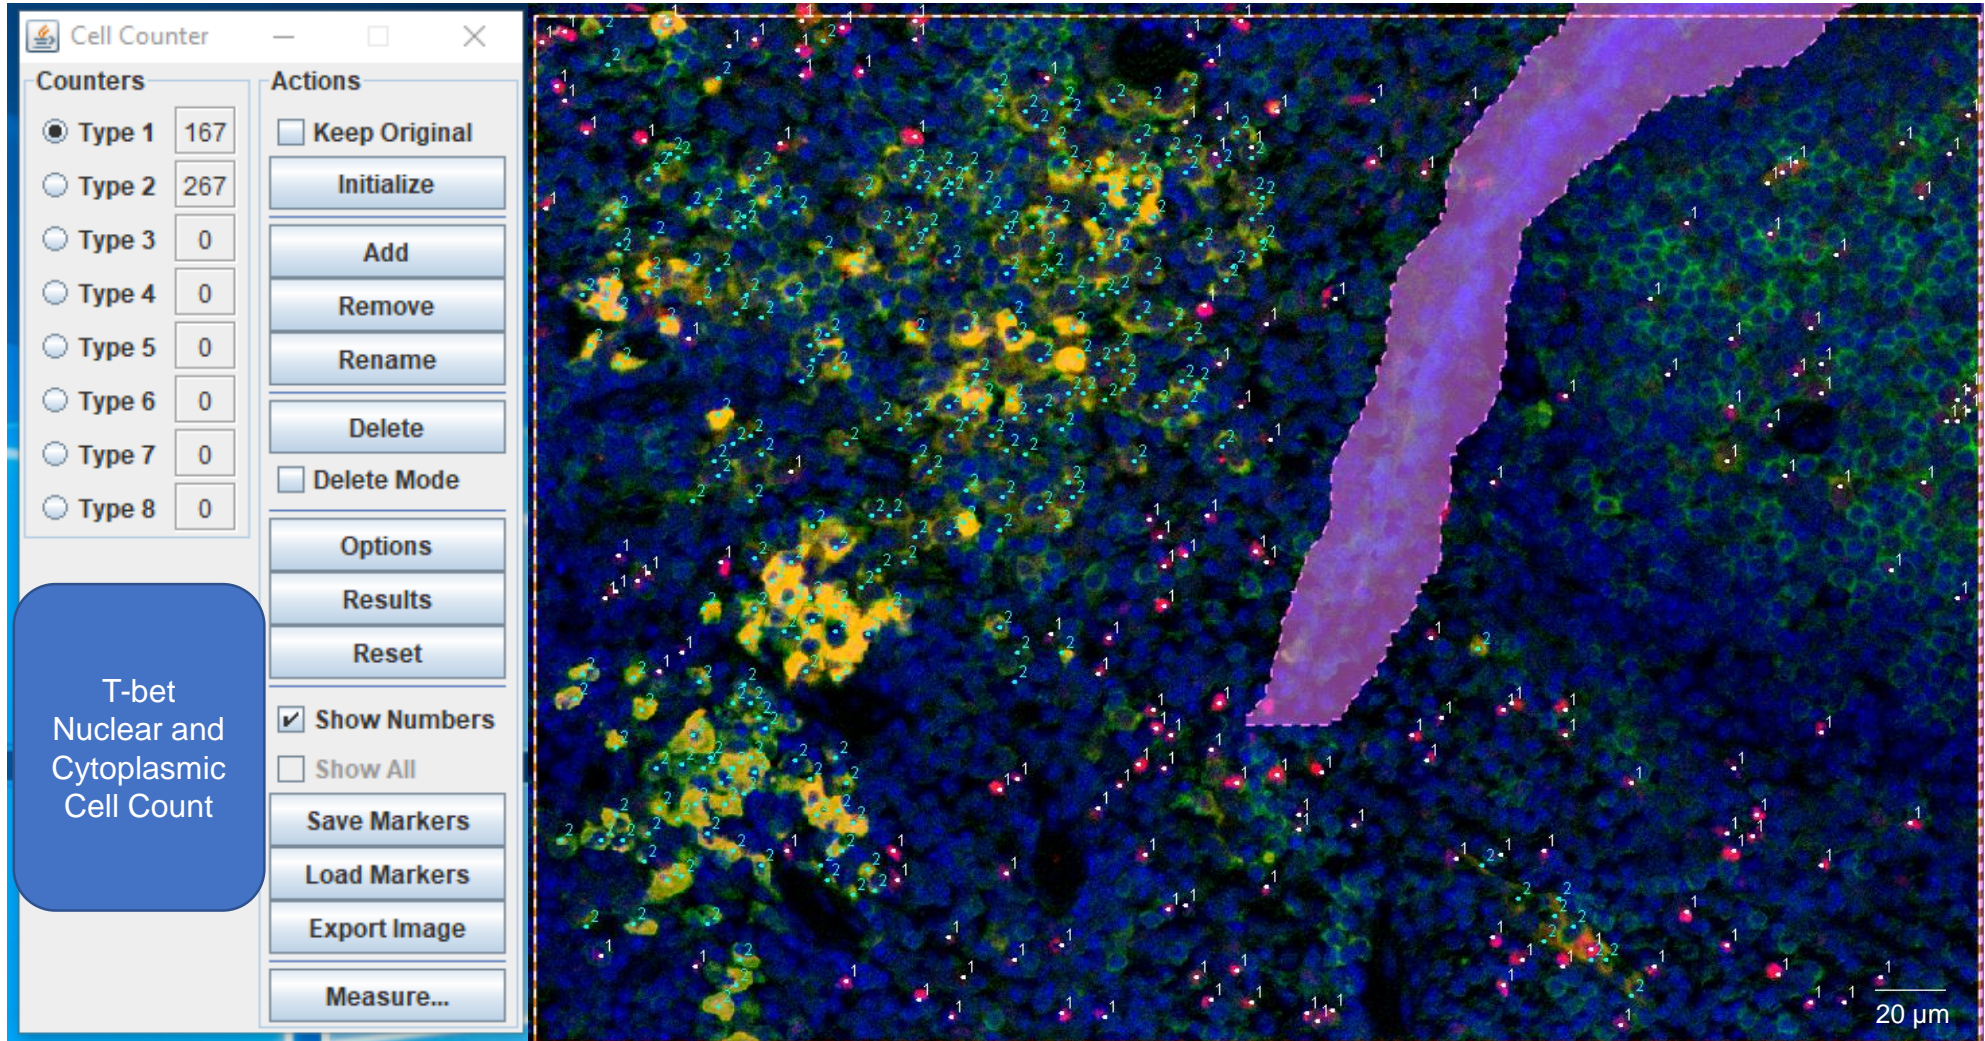

# CD4 Cell Count

H

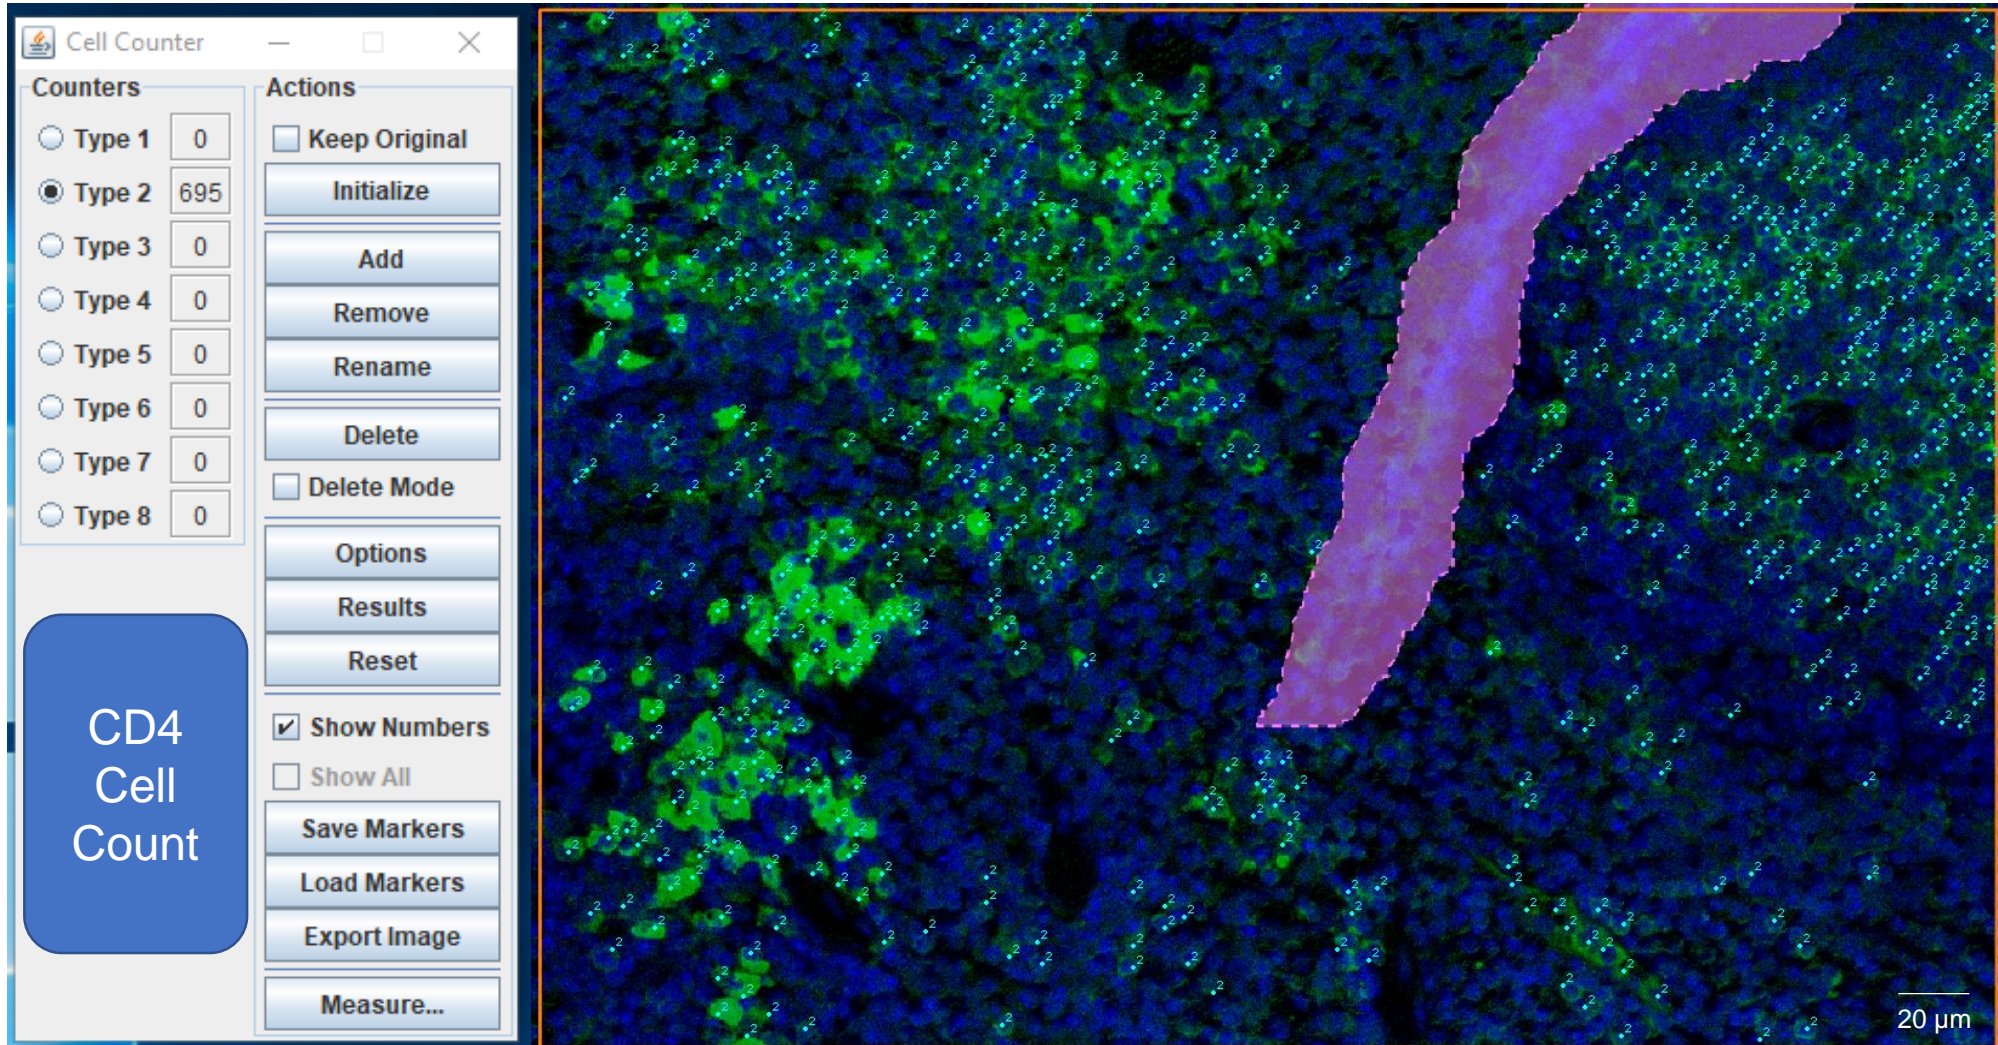

Supplement: NIHMS995134-supplement-Supplemental_Figure_1.pdf [file NIHMS995134-supplement-Supplemental_Figure_1.pdf]
