# Supplementary material
Source: PubMed Central journal article supplement (PMC6500592)
Supplement: NIHMS995134-supplement-Supplemental_Table_1.pdf [file NIHMS995134-supplement-Supplemental_Table_1.pdf]

**Supplemental Table 1.** Performance assessment of StrataQuest quantitation.

|                 | Recall/Sensitivity | Specificity | Precision | F <sub>1</sub> -Score |
|-----------------|--------------------|-------------|-----------|-----------------------|
| Foxp3           | 0.99               | 0.99        | 0.70      | 0.82                  |
| ROR $\gamma$ T  | 0.97               | 0.92        | 0.44      | 0.60                  |
| IL-6            | 0.93               | 0.97        | 0.53      | 0.67                  |
| Ki-67           | 0.94               | 0.89        | 0.48      | 0.64                  |
| Granzyme B      | 0.85               | 0.95        | 0.56      | 0.68                  |
| T-bet (nuclear) | 0.90               | 0.99        | 0.88      | 0.89                  |
| T-bet           | 0.98               | 0.90        | 0.63      | 0.77                  |
| CD4             | 0.96               | 0.89        | 0.74      | 0.84                  |
